# Supplementary material for: Iodine-doped carbon fibers as an efficient metal-free catalyst to activate peroxymonosulfate for the removal of organic pollutants
Source: Royal Society of Chemistry journal article supplement (doi:10.1039/c8cy01537f), 2018-01-01
Supplement: c8cy01537f1.pdf [file c8cy01537f1.pdf]

## Supporting Information

### Iodine-doped carbon fibers as an efficient metal-free catalyst to activate peroxymonosulfate for the removal of organic pollutants

Xiudan Liu<sup>1</sup>, Yanchao Chen<sup>1</sup>, Yuyuan Yao\*, Qinghai Bai, Zhiwei Wu

Key Laboratory of Advanced Textile Materials and Manufacturing Technology, Ministry of Education, Zhejiang

Sci-Tech University, Hangzhou 310018, PR China.

E-mail: yyy0571@126.com; Fax: +86 571 86843255; Tel.: +86 571 86843810

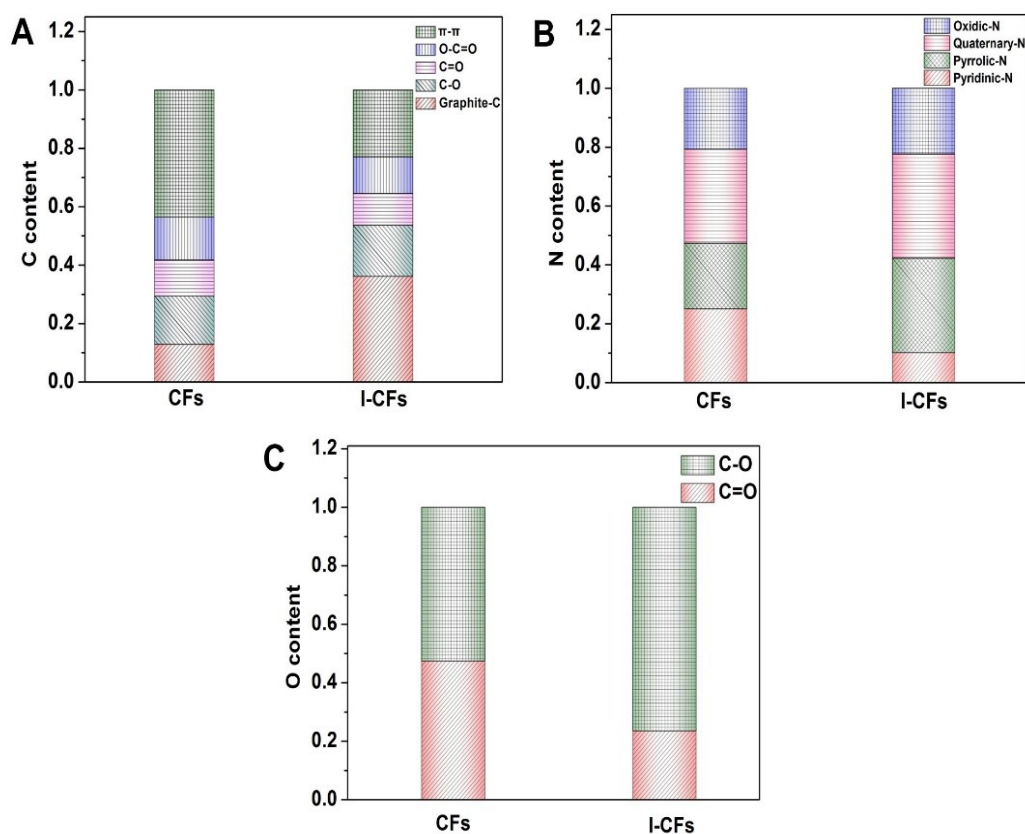

Fig. S1 (A) Contents of five carbon species. (B) Contents of four nitrogen species. (C) Contents of two oxygen species.

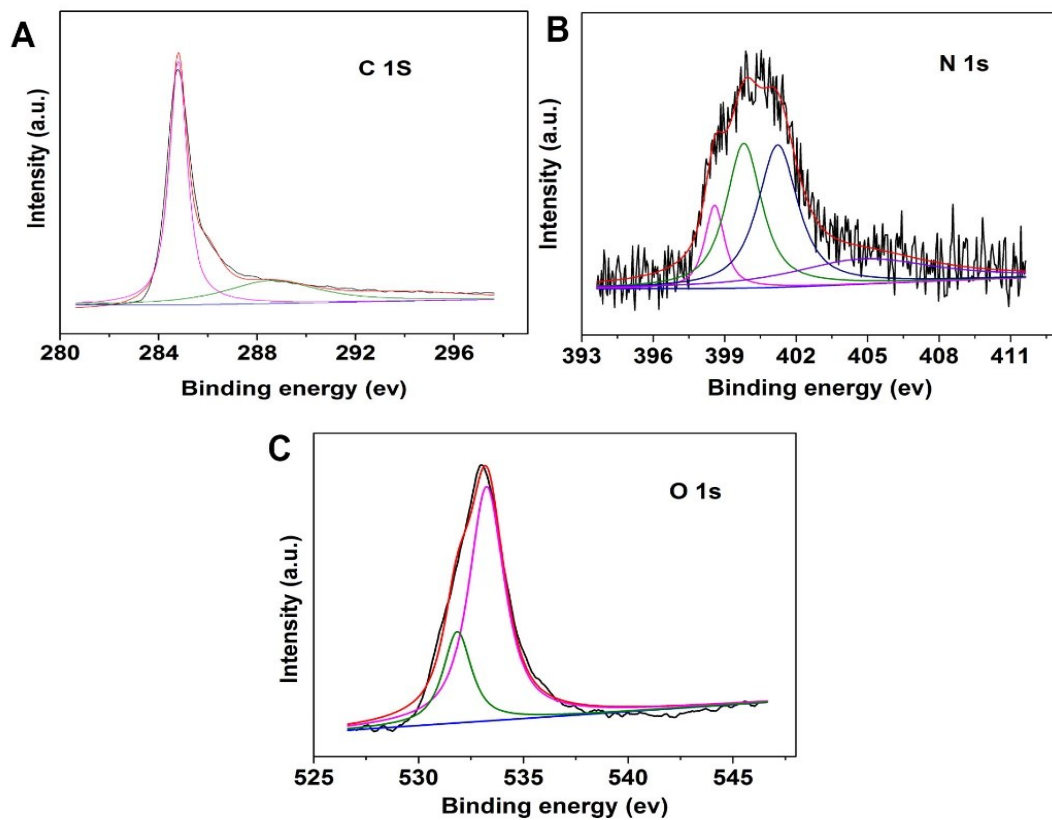

Fig. S2 (A-C) C 1s, N 1s and O 1s spectra, respectively.

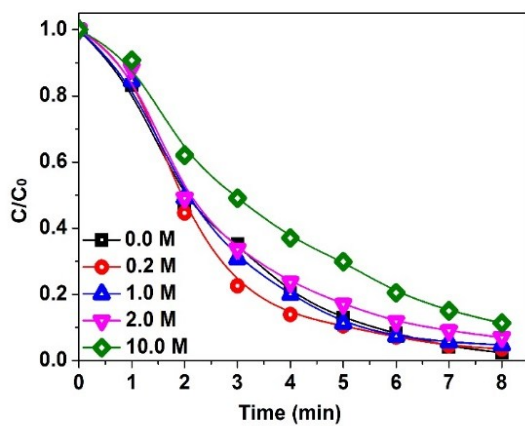

Fig. S3 Effect of EA on the removal of AR1 in I-CFs/PMS system. Conditions: I-CFs dosage: 1 g/L, [AR1]=50  $\mu$ M, [PMS]=2 mM, sample's pH 7.0, T=20  $^{\circ}$ C.

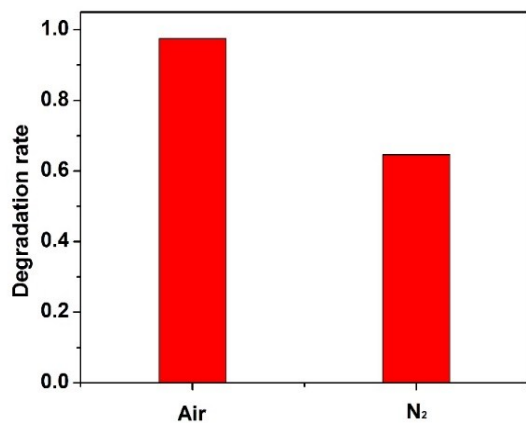

Fig. S4 Effects of AR1 removal with different ambient in the I-CFs/PMS system. Conditions: I-CFs dosage: 1 g/L, [AR1]=50  $\mu$ M, [PMS]=2 mM, sample's pH 7.0, T=20  $^{\circ}$ C.

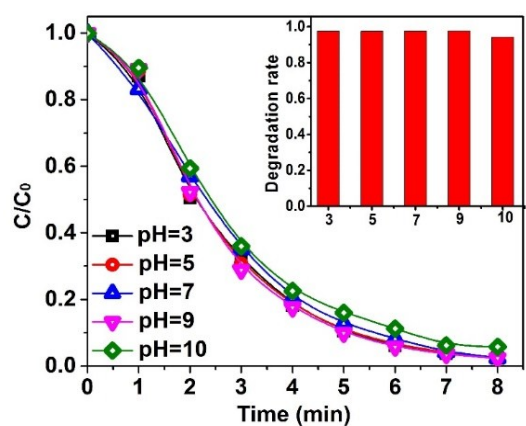

Fig. S5 Effects of initial pH on the removal rate of AR1 in the I-CFs/PMS system. Conditions: I-CFs dosage: 1 g/L, [AR1]=50  $\mu$ M, [PMS]=2 mM, T=20  $^{\circ}$ C.

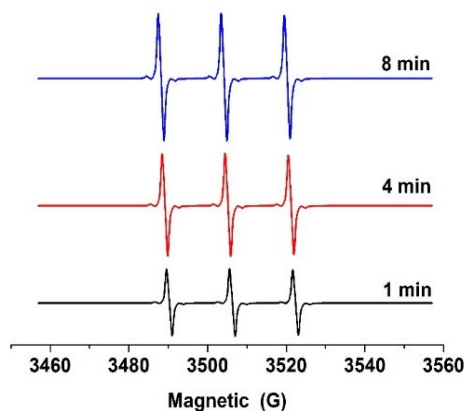

Fig. S6 Different time intervals of TEMP spin-trapping EPR spectra in I-CFs/PMS system. Conditions: I-CFs dosage: 1 g/L, [AR1]=50  $\mu$ M, [PMS]=2 mM, sample's pH 7.0, T=20  $^{\circ}$ C.

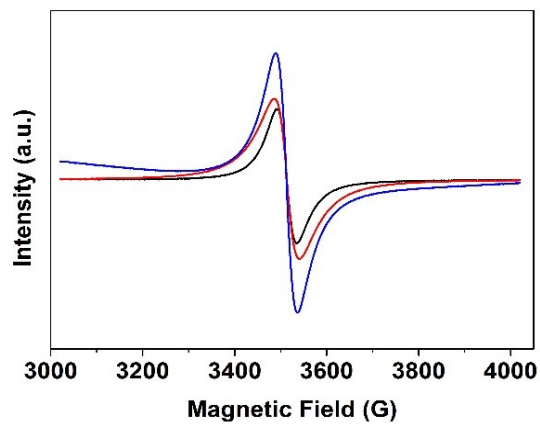

Fig. S7 EPR spectra of I-CFs at different reaction time under room temperature. Conditions: I-CFs dosage: 1 g/L, [AR1]=50  $\mu$ M, [PMS]=2 mM, sample's pH 7.0, T=20  $^{\circ}$ C.
